# Supplementary material for: Impact of the Si/Al ratio on the ethanol/water coadsorption on MFI zeolites revealed using original quantitative IR approaches
Source: Royal Society of Chemistry journal article supplement (doi:10.1039/d3cp00549f), 2023-01-01
Supplement: d3cp00549f1.pdf [file d3cp00549f1.pdf]

## Impact of the Si/Al ratio on the ethanol/water coadsorption on MFI zeolites revealed by original quantitative IR approaches.

Rita Zakhia Douaihy,<sup>a</sup> Louwanda Lakiss,<sup>a</sup> Mohamad El-Roz,<sup>a</sup> Yoann Levaque,<sup>a</sup> Alexandre Vimont<sup>a</sup> and Philippe Bazin\*,<sup>a</sup>

### Supporting information

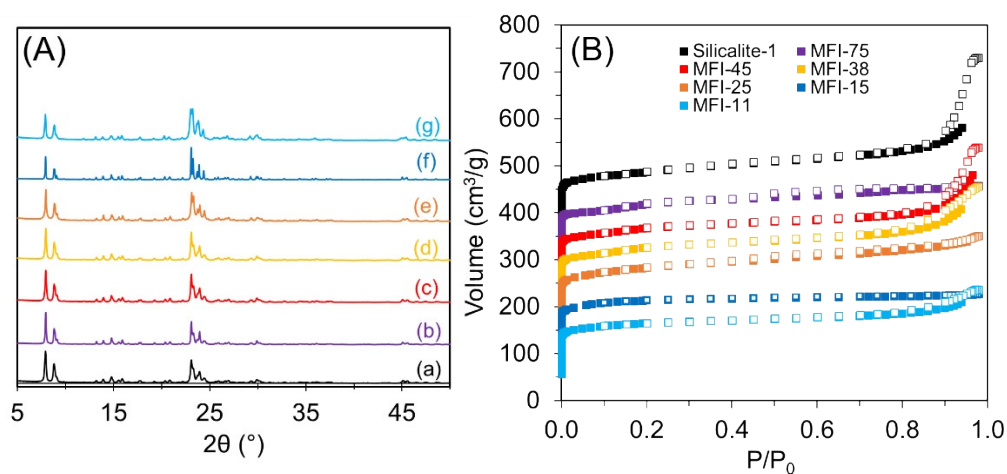

**Figure S1:** (A) PXRD patterns and (B)  $N_2$  adsorption/desorption isotherms at 77 K of Silicalite-1 (black, (a)), MFI-75 (purple, (b)), MFI-45 (red, (c)), MFI-38 (yellow, (d)), MFI-25 (orange, (e)), MFI-15 (dark blue, (f)) and MFI-11 (light blue (g)). The adsorption/desorption isotherms are offset vertically for comparison.

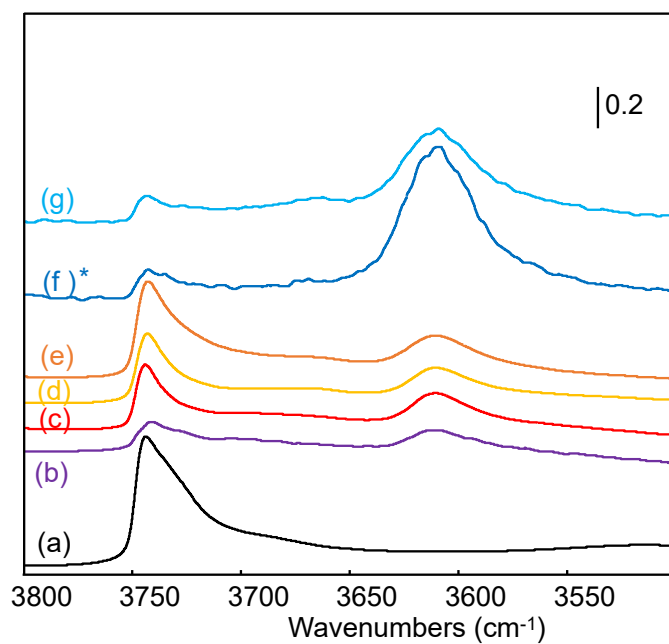

**Figure S2:** FTIR spectra in the OH region between 3800 and 3500  $\text{cm}^{-1}$  for Silicalite-1 (black, (a)), MFI-75 (purple, (b)), MFI-45 (red, (c)), MFI-38 (yellow, (d)), MFI-25 (orange, (e)), MFI-15 (dark blue, (f)) and MFI-11 (light blue (g)). The spectra were recorded at RT and normalized to the mass of the pellet (20 mg). \* the higher intensity of the  $\nu(\text{OH})$  band results from an IR light scattering effect due to the big crystallites size of the MFI-15 sample (compared to other zeolites).

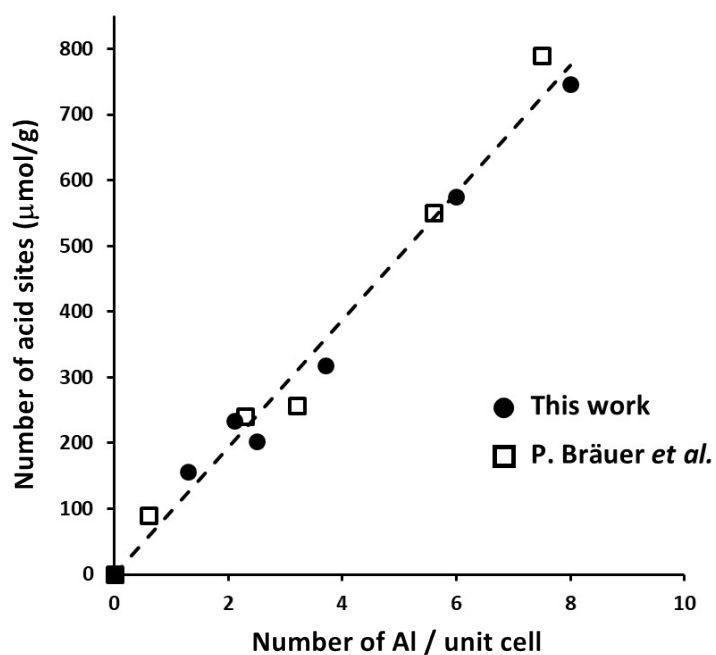

**Figure S3:** Linear evolution of the total amount of acid sites (Lewis + Bronsted) as a function of the Al content per unit cell. Black circle : this work and empty square : values reported from P. Bräuer, O. Situmorang, P; L. Ng and C. D'Agostino, Phys. Chem. Chem. Phys., 2018, 20, 4250

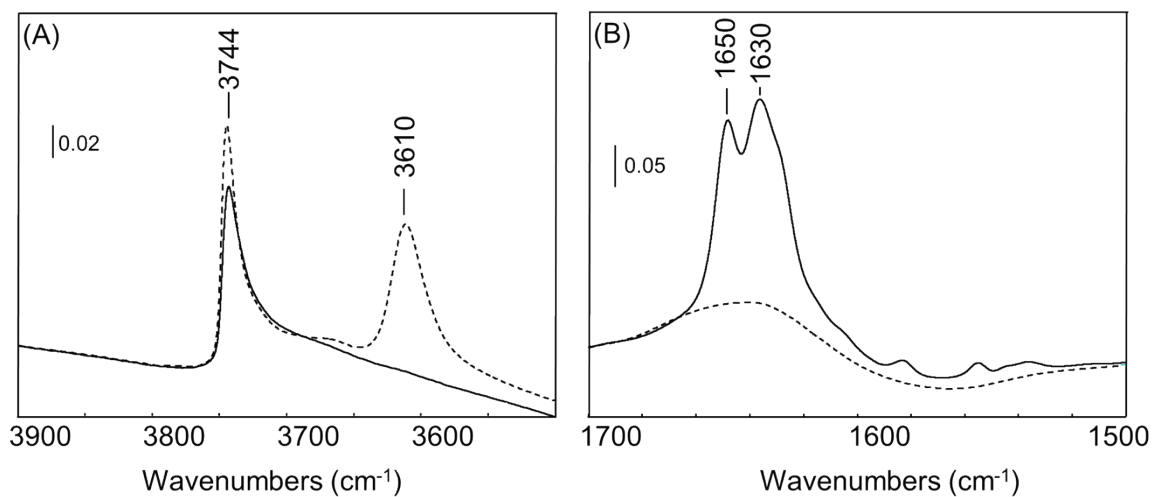

**Figure S4:** FTIR spectra in the OH region between 3800 and 3500  $\text{cm}^{-1}$  (A) and in the region between 1700 and 1500  $\text{cm}^{-1}$  (B) for MFI-45 before (dashed line) and after (solid line) adsorption of Lutidine.

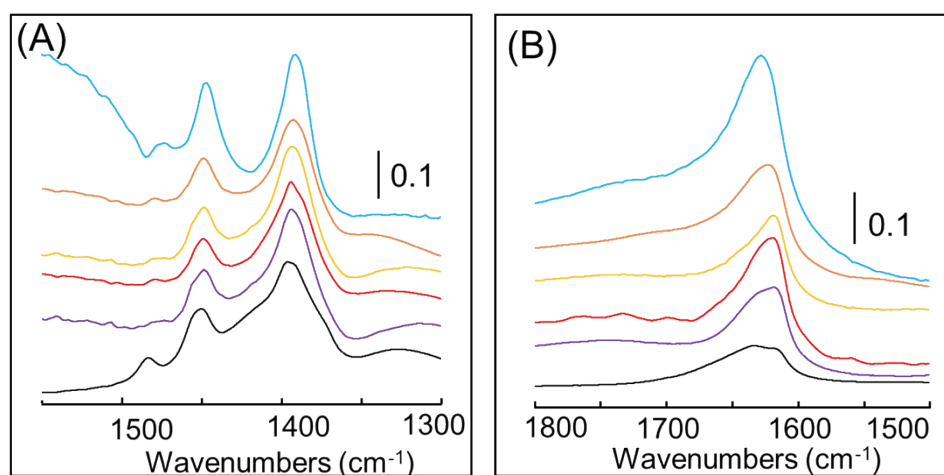

**Figure S5:** Evolution of the IR spectra (subtracted spectra) of different zeolites after adsorption of (A) ethanol ( $P/P_0 = 0.129$ ) and (B) water ( $P/P_0 = 0.16$ ) on Silicalite-1 (black), MFI-75 (purple), MFI-45 (red), MFI-38 (yellow), MFI-25 green, and MFI-11 (light blue). The spectra are normalized to the mass of the pellet (20 mg).

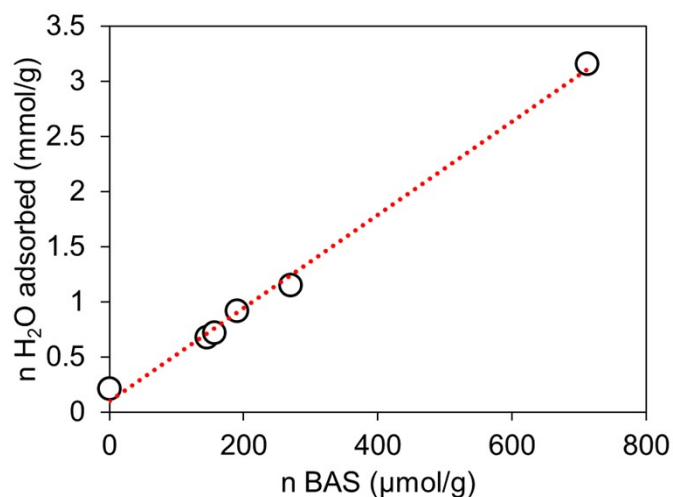

**Figure S6:** Linear correlation between Bronsted acid sites calculated after Pyridine adsorption and the quantity of adsorbed water at water partial pressure  $P/P_0 = 0.0065$ , for MFI zeolites with different Si/Al ratios.

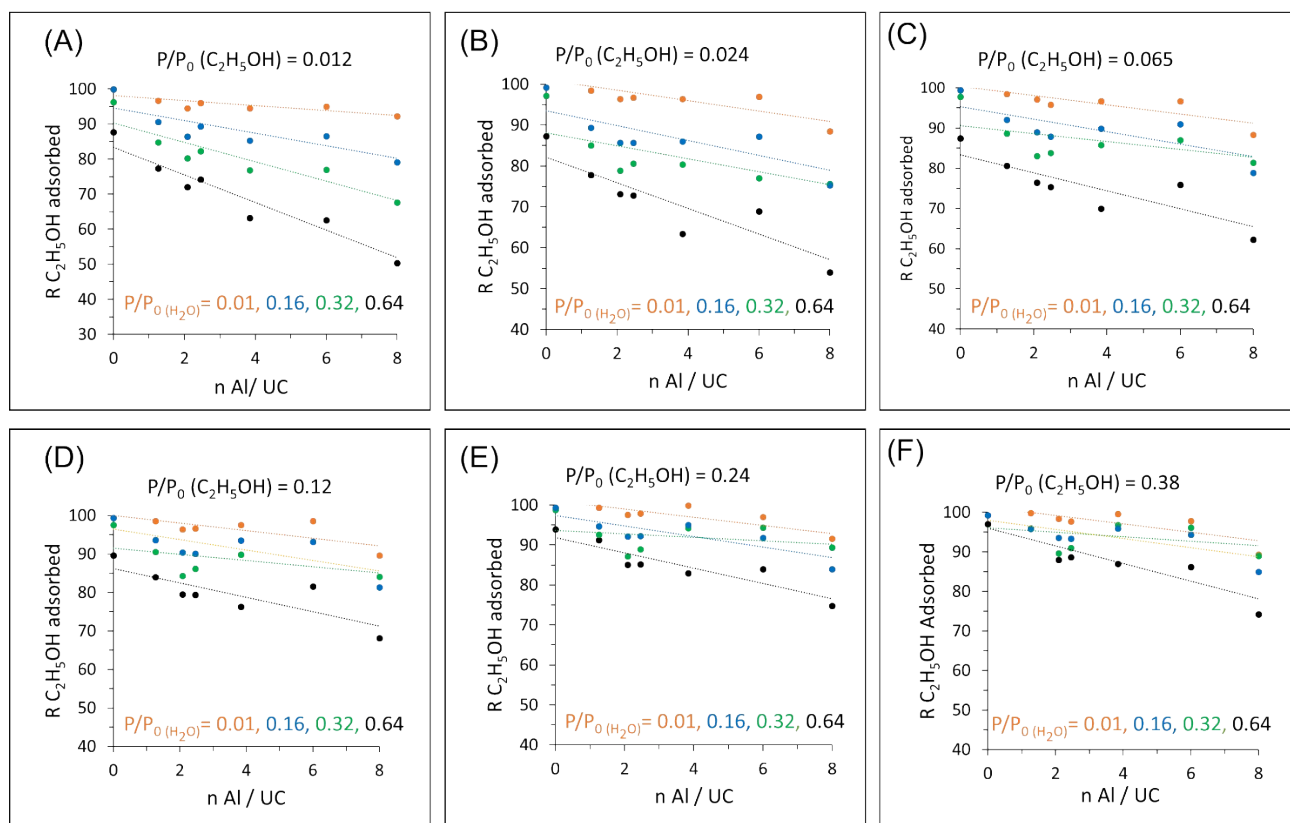

**Figure S7:** Ratio of adsorbed  $C_2H_5OH$  vs the number of Al per unit cell for  $P/P_0(C_2H_5OH) = 0.012$  (A), 0.024 (B), 0.065 (C), 0.12 (D), 0.24 (E) and 0.38 (F) after adsorption of different water partial pressures ( $P/P_0(H_2O) = 0.01$  (orange),  $P/P_0(H_2O) = 0.16$  (blue),  $P/P_0(H_2O) = 0.32$  (green) and  $P/P_0(H_2O) = 0.64$  (black)) for different MFI zeolites.
